# Supplementary material for: The assembly of polyethyleneimine-entrapped gold nanoparticles onto filter paper for catalytic applications
Source: Royal Society of Chemistry journal article supplement (doi:10.1039/c5ra20192f), 2015-01-01
Supplement: c5ra20192f1.pdf [file c5ra20192f1.pdf]

## Electronic Supplementary Information

### The assembly of polyethyleneimine-entrapped gold nanoparticles onto filter paper for catalytic applications†

Lei Liu,<sup>a</sup> Yili Zhao,<sup>b</sup> Qian Chen,<sup>c</sup> Xiangyang Shi,<sup>\*acd</sup> Mingwu Shen<sup>\*a</sup>

<sup>a</sup> College of Chemistry, Chemical Engineering and Biotechnology, Donghua University, Shanghai 201620, People's Republic of China

<sup>b</sup> Key Laboratory of Textile Science & Technology, Ministry of Education, College of Textiles, Donghua University, Shanghai 201620, People's Republic of China

<sup>c</sup> State Key Laboratory for Modification of Chemical Fibers and Polymer Materials, College of Materials Science and Engineering, Donghua University, Shanghai 201620, People's Republic of China

<sup>d</sup> CQM-Centro de Química da Madeira, Universidade da Madeira, Campus da Penteada, 9000-390 Funchal, Portugal

---

\* Corresponding author. Email: xshi@dhu.edu.cn (X. Shi) and mwshen@dhu.edu.cn (M. Shen).

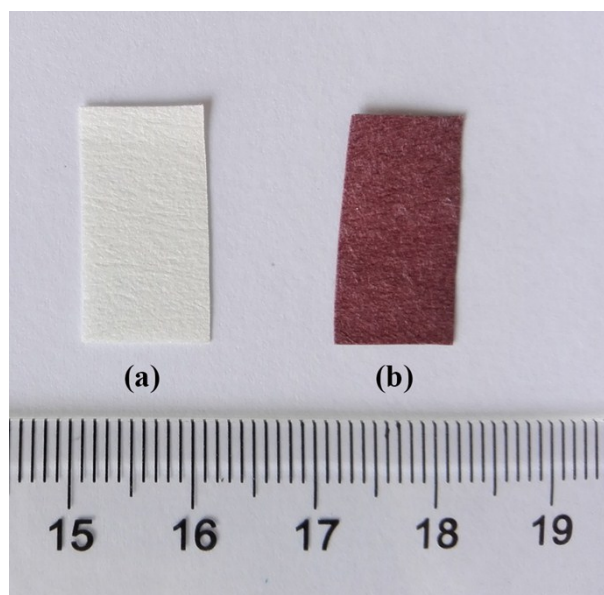

**Figure S1.** Photograph of the filter paper before (a) and after (b) the assembly of Au PENPs for 48 h.

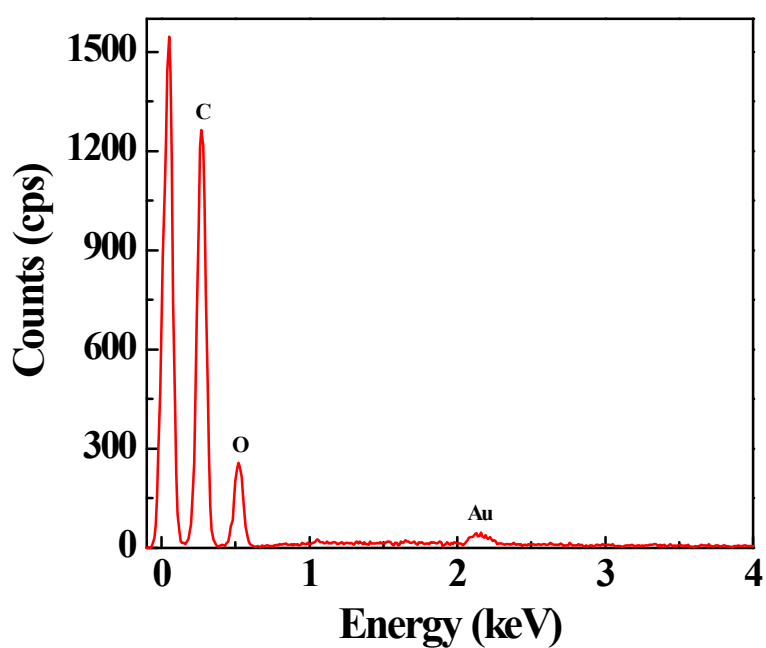

**Figure S2.** EDS spectrum of the Au PENP-assembled filter paper.

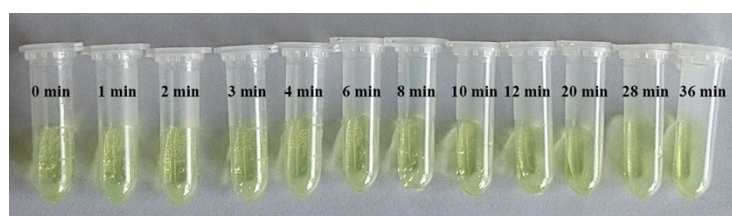

**Figure S3.** Photograph of the 4-NP aqueous solution treated with the filter paper without the assembly of Au PENPs at different time intervals.

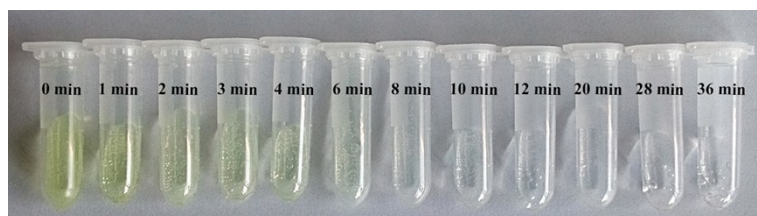

**Figure S4.** Photograph of the 4-NP aqueous solution treated with the filter paper assembled with Au PENPs at different time intervals.
